1 **Risk factor analysis of equine strongyle resistance to anthelmintics**

2

3 Sallé G.<sup>1,\*</sup>, Cortet J.<sup>1</sup>, Bois I.<sup>2</sup>, Dubès C.<sup>2</sup>, Guyot-Sionest Q.<sup>3</sup>, Larrieu C.<sup>3</sup>, Landrin V.<sup>4</sup>,

4 Majorel G.<sup>5</sup>, Wittreck S.<sup>6</sup>, Woringer E.<sup>7</sup>, Couroucé-Malblanc A.<sup>3</sup>, Guillot J.<sup>4</sup>, Jacquet P.<sup>2</sup>,

5 Guégnard F.<sup>1</sup>, Blanchard A.<sup>1</sup>, Leblond A.<sup>5</sup>

6

7 <sup>1</sup>, INRA/Université de Tours UMR1282 Infectiologie et Santé Publique

8 <sup>2</sup>, UMR INRA/ENV Toulouse 1225 IHAP, Ecole Nationale Vétérinaire de Toulouse, France

9 <sup>3</sup>, LUNAM University, Oniris, unité de recherche NP3, 102 Route de Gachet, 44300 Nantes,

10 France

11 <sup>4</sup>, Parasitology dept, Dynamyc EnvA, UPEC, Ecole nationale vétérinaire d'Alfort, UPE,

12 Maisons-Alfort, France

13 <sup>5</sup>, EPIA, INRA, VetAgroSup, University of Lyon, 69280 Marcy L'Etoile, France

14 <sup>6</sup>, Merial SAS, 29 avenue Tony Garnier, 69007 Lyon, France

15

16 <sup>7</sup>, Zoetis, 10 rue Raymond David, 92240 Malakoff, France

17

18 \*, corresponding author: [Guillaume.Salle@inra.fr](mailto:Guillaume.Salle@inra.fr)

19 Permanent address : INRA Val de Loire, F-37380 Nouzilly, France

20

21

22 **Abstract**

23 Digestive strongyles are the most problematic endoparasites of equids as a result of their  
24 wide distribution and the spread of resistant isolates throughout the world. While abundant  
25 literature can be found on the extent of anthelmintic resistance across continents, empirical  
26 knowledge about associated risk factors is missing. This study brings together results from  
27 anthelmintic efficacy testing and risk factor analysis to provide evidence-based guidelines in  
28 the field. It involves 688 horses from 39 French horse farms and riding schools to both  
29 estimate egg reduction rate (ERR) after anthelmintic treatment and to interview premise  
30 managers about their practices. Risk factors associated with reduced anthelmintic efficacy in  
31 equine strongyles have been estimated across drugs or for every drug class separately using a  
32 marginal modelling approach. Results demonstrate ivermectin efficacy (96.3% ERR), the  
33 inefficacy of fenbendazole (42.8% ERR) and an intermediate profile for pyrantel (90.3%  
34 ERR). Risk factor analysis provide robust support to advocate for FEC-based treatment  
35 regimens as well as individual determination of anthelmintic dose that contribute to  
36 significantly lower drug resistance risk by factors 1.72 and 2.56 respectively. In addition,  
37 reduced horse movements should also be recommended to sustain anthelmintic efficacy (odd  
38 ratio=0.42 [0.26;0.69]) while the horse-to-worker ratio may be an indicator of better efficacy.  
39 On the contrary, outdoor-breeding systems, grazing systems with little rotation and manure  
40 spreading significantly increased the risk of reduced drug efficacy by factors 1.71 to 7.56.  
41 This is the first empirical risk factor analysis for anthelmintic resistance in equids, whose  
42 findings should guide the implementation of more sustained strongyle management in the  
43 field.

44

45 **Keywords:** horse, nematode, anthelmintic resistance, strongyle, odd ratio

46

## 47 **1. Introduction**

48 The diversity of helminth species infecting horses is large, and differences in life cycles,  
49 epidemiology, pathogenicity and drug susceptibility make it increasingly challenging to  
50 define good sustainable parasite control programs. Strongyles remain a major concern. They  
51 can be classified into two sub-families, namely Strongylinae (large strongyles) and  
52 Cyathostominae known as small strongyles or cyathostomins (Lichtenfels et al., 2008). The  
53 large strongyle *Strongylus vulgaris* is associated with high mortality rate as a result of  
54 verminous arteritis it can cause during its life cycle (Nielsen et al., 2016). This species has  
55 been successfully maintained under low prevalence levels by anthelmintics, despite recent  
56 reports of putative re-emergence associated with reduced frequency of anthelmintic  
57 treatments (Nielsen et al., 2016; Nielsen et al., 2012). On the contrary, cyathostomins have  
58 been a growing concern in the field (Matthews, 2014; Peregrine et al., 2014). This group of  
59 nematodes encompasses 50 known species (Lichtenfels et al., 2008), with a ubiquitous  
60 distribution throughout geo-climatic conditions (Sallé, 2015) and infecting both young and  
61 adult horses (Corning, 2009). Their life cycle is direct and usually involves encystment of  
62 infective larvae into the caeco-colic mucosa of their hosts (Corning, 2009). In heavily  
63 infected horses, *en-mass* emergence of these encysted larvae can lead to critical clinical state  
64 characterized by a loss of weight, colic, diarrhoea, protein-losing enteropathy and eventually  
65 death of the animal (Love et al., 1999; Murphy and Love, 1997).

66 Use of anti-infectious drugs put pathogen populations under selection pressure that can  
67 ultimately lead to the emergence of resistant or multi-drug resistant populations (Kennedy  
68 and Read, 2017). Over the past decades, small strongyle populations, as other livestock-  
69 infecting parasitic nematodes (Kaplan and Vidyashankar, 2012), have demonstrated a gradual  
70 increase in their resistance to available anthelmintics in every part of the world (Matthews,  
71 2014; Peregrine et al., 2014). Under the French setting (Traversa et al., 2012) like in other

72 European (Relf et al., 2014; Traversa et al., 2007; Traversa et al., 2009) or American  
73 countries (Canever et al., 2013; Lyons et al., 2008; Molento et al., 2008; Slocombe and de  
74 Gannes, 2006), resistant strongyle populations have been reported for every available class of  
75 anthelmintics, namely benzimidazoles, tetrahydropyrimidines or macrocyclic lactones.

76 Even if these results shed lights on how widespread the resistance is, critical assessment of  
77 associated risk factors and species composition of resistant parasitic populations is still  
78 lacking (Nielsen, 2012), hence preventing the implementation of clear guidelines in the field.

79 There have been a limited number of reports focusing on factors associated with prevalence  
80 of strongyle infection in horses in Germany (Fritzen et al., 2010; Hinney et al., 2011a) or the  
81 impact of faeces removal on prevalence in UK (Corbett et al., 2014). However, available  
82 knowledge gathered so far has usually considered separately drenching practices (Hinney et  
83 al., 2011b; Lendal et al., 1998; Lind et al., 2007; O'Meara and Mulcahy, 2002; Relf et al.,  
84 2012) and estimation of anthelmintic efficacy if any (Relf et al., 2014; Tzelos et al., 2017).

85 As a consequence, a knowledge gap about putative risk factors and their impacts remains  
86 (Nielsen, 2012).

87 This study results of a large-scale survey involving 688 horses from 39 French horse farms  
88 and riding schools that have been submitted to both an anthelmintic efficacy test and a  
89 questionnaire interview about their practices. Risk factors associated with reduced  
90 anthelmintic efficacy in equine strongyles have been estimated across drugs or for every drug  
91 class separately. The objective of this study was to bring together anthelmintic efficacy  
92 testing and risk factor analysis to provide evidence-based guidelines in the field.

93

94

95 **2. Materials and methods**

96 **2.1. Farm and riding school sampling**

97 Our study aimed to evaluate drug efficacy for three drug classes and if possible, to have a  
98 control group. Following the WAAVP guidelines (Coles et al., 2006), this is equivalent to  
99 identify four groups of at least five individuals with faecal egg count (**FEC**) above 150  
100 eggs/g. Therefore, stud farms with at least 20 births per year were selected from the French  
101 Horse and Riding Institute (IFCE) database. This condition brought the focus onto four  
102 French regions, *i.e.* Normandy, Loire Valley, Aquitaine and Burgundy.

103 Two additional criteria were defined to increase the chance of finding horses with sufficient  
104 excretion load to undertake FEC reduction test. First, premises with less than 40 horses were  
105 discarded as FEC is usually over-dispersed and focusing on less individuals would not have  
106 permitted to build treatment groups. Second, last anthelmintic treatment should have been  
107 done three months earlier that corresponds to post-moxidectin treatment egg reappearance  
108 period. Flyers explaining the purpose of the project were then sent to pre-selected farms  
109 before a phone call was made to each manager to make sure that their premises fulfilled  
110 requested criteria (at least 40 horses not drenched in the last three months) and to confirm  
111 their willingness to participate. In the end, 19 stud farms were enrolled, *i.e.* five in  
112 Normandy, four in Loire Valley, four in Burgundy and six in Aquitaine. For each of these,  
113 matching riding schools located within each stud farm area were subsequently identified and  
114 enrolled for anthelmintic efficacy test, with an extra-riding school enrolled in Aquitaine,  
115 providing a set of 20 riding schools. This set of matching riding schools was used to  
116 investigate putative differences between stud farms and riding schools.

117

118 **2.2. Horse sampling and anthelmintic resistance tests**

119 A first round of faecal sampling was made one week before drenching, to select for  
120 individuals with a minimum excretion level of 150 eggs per g (epg) as recommended by the  
121 World Association for the Advancement of Veterinary Parasitology, WAAVP (Coles et al.,  
122 2006). Faecal material was stored at 4°C before being processed for faecal egg counting  
123 within 24h. Based on individual FEC measured, three treatment groups, *i.e.* fenbendazole  
124 (**FBZ**), pyrantel (**PYR**), or ivermectin (**IVM**), balanced for FEC were built. In case additional  
125 individuals were available, they were allocated to a control group. On day 0, each horse was  
126 weighed using a girth tape and orally administered an anthelmintic dose following  
127 manufacturer's requirements.

128 Faecal material was subsequently taken from each horse 14 days after treatment. Ivermectin-  
129 treated individuals were also sampled 30 days after drenching to detect reduced egg-  
130 reappearance period. This short time interval was chosen as an optimum between being able  
131 to identify suspicious situations and minimising disturbance with premise activities (horse  
132 sales or movements).

133

### 134 **2.3. Processing of faecal material**

135 FEC were measured by sampling 5g of faecal material for each individual horse,  
136 subsequently diluted and thoroughly mixed into 75 mL of a NaCl solution (density of 1.18).  
137 Prepared solution was loaded on a McMaster slide and strongyle eggs were counted with a  
138 sensitivity of 15 epg.

139

### 140 **2.4. Questionnaire survey and variable definition**

141 A questionnaire, built upon previous published surveys (Fritzen et al., 2010; Maddox et al.,  
142 2012), was used to interview each manager as part of larger survey on antibiotic and  
143 anthelmintic resistance. The anthelmintic-associated questions grouped into four categories,

144 addressing husbandry, available pasture and management, horse health management, and  
145 drenching strategy.

146 For statistical inference, a few variable levels were redefined to avoid redundancy and to  
147 provide the analysis with more statistical power. Therefore, one farm that did not apply  
148 systematic drenching upon horse arrival was considered as not drenching any horse upon  
149 arrival at all. Rotation between pastures was recoded as occurring either more (frequent) or  
150 less (rare) than every 3 months or never.

151 In addition, pasture strategies either involved own private pastures dedicated to horses or  
152 alternative strategies that included co- grazing with cattle, or access to pastures shared  
153 between several breeders. Available pasture surface was considered as a three-level variable,  
154 *i.e.* less than 30 ha, more than 80 ha or in-between.

155 Two types of managers were distinguished between the ones who tried to manage health  
156 problem themselves before calling their practitioner or others, calling as soon as possible.

157 Anthelmintic provider was considered as a two-level factor contrasting cases where  
158 veterinarians delivered the drug or not. Reasons grounding drenching programs were the  
159 same across farms, *i.e.* driven by horse well-being and growth, and were not included further  
160 in the risk factor analysis.

161

## 162 **2.5. Statistical analyses**

### 163 **2.5.1. Egg Reduction Rate (ERR) and bootstrapping procedure**

164 Sample size to estimate reduced ERR prevalence was determined using EpiTools web-server  
165 (Humphry et al., 2004).

166 When a control group was available, ERR values was computed at farm level by averaging  
167 treatment group FEC following (Dash et al., 1988):

$$168 \quad ERR = 1 - \left( \frac{\text{mean FEC control, before treatment}}{\text{mean FEC control, after treatment}} \times \frac{\text{mean FEC treated, after treatment}}{\text{mean FEC treated, before treatment}} \right) \times 100,$$

169 hereafter referred to as **Method 1**.

170 Otherwise, ERR has been computed following (Coles et al., 1992):

$$171 \quad ERR = \left( 1 - \frac{\text{mean FEC treated, after treatment}}{\text{mean FEC treated, before treatment}} \right) \times 100,$$

172 hereafter denoted **Method 2**.

173 For both methods, associated 95% percentile confidence intervals was determined for the  
174 region, premise type and drug class and their respective intersections following a block  
175 bootstrap approach. Drug class ERR confidence intervals at the farm level were not estimated  
176 as too few individuals were available within each treatment group preventing robust  
177 inference of estimate variability (Chernick, 1999). This approach takes into account the  
178 correlation among observations from the same individual (before and after treatment). For  
179 both ERR computation methods, blocks of FECs from the same horse were sampled with  
180 replacement from the observed data collected before and after treatment (within region,  
181 premise type and drug class), and were used to compute an ERR estimate using equation (1)  
182 or (2) accordingly. In that case of method 1, the time-matched control group is used to  
183 account for variation in FEC between the two sampling time-points independent of treatment.  
184 Therefore, blocks of individual FEC before and after treatment were sampled with  
185 replacement from horses belonging to the treated or the control group within a farm.

186 In both cases, computation was performed 10,000 times to yield the empirical distribution of  
187 the ERR from which 2.5 and 97.5% percentiles were sampled to derive the 95% confidence  
188 interval.

189

### 190 **2.5.2. Variable selection procedure**

191 The aim of this study was to quantify risk factors associated with reduced anthelmintic  
192 efficacy, hence associating measured drug efficacy with management practices. This requires  
193 to select the set of variables that would maximize total variance explained, while avoiding



194 likelihood inflation through over-parameterization. Therefore, for every model construction,  
195 a forward-backward procedure was implemented on a full generalized linear model including  
196 every variable built from the questionnaire and premise type and regions. To overcome  
197 model convergence issues, variables showing too little or no variation across farms (control  
198 serology or coproscopy upon horse arrival, faeces removal, access to pasture, horse weight  
199 estimation, veterinarian specialization, number of veterinary practices considered for  
200 diagnostic) were discarded. Additionally, the total number of veterinary drugs found on-site  
201 or the frequency of health register updates were not considered further as determinants of  
202 anthelmintic efficacy. This led to 21 variables on the top of premise type and regions.

203

### 204 **2.5.3. Marginal modelling of drug efficacy**

205 A marginal modelling approach of individual horse egg count reduction rate (ERR) was  
206 applied as outlined elsewhere (Walker et al., 2014) and implemented in R (R Core Team,  
207 2016) with the geepack package (Højsgaard S., 2006). In that framework, individual egg  
208 counts measured at a given time, before or after treatment, are assumed to be Poisson  
209 distributed and thus modelled with a log-linear regression model.

210 This model includes environmental variables (listed in Supplementary table 4 for each  
211 specified model) interacting with a binary variable coding for the treatment, *i.e.* taking value  
212 of 1 after treatment or 0 before treatment. This variable accounts for the treatment-mediated  
213 change in egg count reduction, hence estimating ERRs, while the fitted interactions estimate  
214 the contribution of considered environmental conditions to ERRs (Crellen et al., 2016).  
215 Exponentiated estimates therefore provide the relative risk of increased (relative risk above  
216 one) / decreased (relative risk smaller than one) ERRs associated with a given environmental  
217 variable. Any variable whose relative risk confidence interval does not include one is  
218 declared as significantly impacting on the ERRs. A first model aimed to quantify universal

219 risk factors, *i.e.* considered environmental effects across drug class. Treatment group was  
220 thus fitted into the model. Drug class-specific analyses based on individual treatment group  
221 data taken separately were subsequently implemented for fenbendazole and pyrantel, to  
222 identify drug-specific factor involved in reduced efficacy. The lack of variation in ivermectin  
223 ERR did not permit to investigate further ivermectin-specific risk factors.

## 224 **3. Results**

### 225 **3.1. Observations from questionnaire surveys**

226 Detailed answers from questionnaire surveys are provided as supplementary data 1.

227

#### 228 **3.1.1. Premise structure and organisation**

229 Considered premises had a mean herd size of 70 horses, ranging from 21 to 250 individuals.

230 This variation was mostly driven by the type of premise considered ( $p=0.008$ ), as stud farms

231 comprised more horses than riding schools (average herd size of 88.3 and 52.2 respectively)

232 whatever region. Horses were generally housed (figure 1A) in individual boxes ( $n=31/39$ )

233 and a few premises had an outdoor-only breeding system ( $n=7/39$ ). Noticeably staff team did

234 not strongly scale with herd size ( $r=0.33$ ,  $p=0.04$ ), especially in stud farms where workers

235 were in charge of 13 horses more than in riding schools ( $p<10^{-4}$ ).

236

#### 237 **3.1.2. Horse movements on site**

238 Horse movement occurred in half of the premises ( $n=21/39$ ) at least once a month while

239 seven premises were rarely hosting horses from other places (figure 1A). For these

240 introductions, no serology, no coproscopy and no anthelmintic efficacy test was performed in

241 any of the 39 premises while anthelmintic drenching upon arrival was implemented in 11

242 riding schools and seven stud farms (figure 1A). Only four managers reported seeking advice

243 from their veterinarians to manage these movements.

244

#### 245 **3.1.3. Pasture availability and management**

246 In every considered premise, horses had access to permanent pastures whose surface ranged

247 from 5 to 425 ha (most of which falling below 30 ha, figure 1B). This surface was similar

248 between regions but higher in stud farms, *i.e.* 107.1 ha compared to 20.4 ha on average in

249 riding schools. Rotation between pastures was implemented in 29 premises at least once a  
250 year (figure 1B) and driven by grass growth and horses could generally (n=27/39) graze  
251 permanently (figure 1B). Three premises had access pastures shared with other breeders, and  
252 mixed grazing of horses with cattle was implemented in seven premises, while others used  
253 their own pastures dedicated for horses only (figure 1B). Faeces removal was never  
254 implemented but in one premise, while manure spreading was performed in one third  
255 (n=10/39) of the surveyed premises (figure 1B).

256

#### 257 **3.1.4. Health management and interactions with veterinarians**

258 About two-third of the premises relied on specialized equine practitioners (n=24/39), who  
259 were often called after managers had already attempted to manage health problem themselves  
260 (n=28/39; figure 1C). Half of the premises (n=20/39) were consulting several practices to  
261 cross-validate advice or benefit from several skills or both.

262 Yearly veterinary expenses by individual horse varied from less than 100 € (n=15), between  
263 100 and 200 € (n=14) or more than 200 € (figure 1C). Mandatory on-site health register was  
264 variably used (figure 1C), *i.e.* 20 managers fulfilled it regularly (systematically or on a  
265 regular basis), while 19 rarely did it (never or doing it from time to time). The number of  
266 veterinary drugs found within on-site pharmacy greatly varied from null to 15, with two-third  
267 of premises having 5 drugs or less (figure 1C) and slight trend of more medications found in  
268 horse riding schools (Kruskal-Wallis test, p=0.07).

269

#### 270 **3.1.5. Drenching strategy for intestinal nematodes**

271 Anthelmintic dosing was usually based on a visual weight estimation (n=27/39) that could be  
272 combined with girth tape (n=9/39) but more rarely relying on a scale (n=2/39). Grouped-  
273 based drenching was implemented in 11 premises (figure 1D). Time of drenching was

274 registered most of the time (n=31 premises; figure 1D). Drenching frequency evenly occurred  
275 twice (n=13), thrice (n=11) or four times (n=14) a year (figure 1D), and drenching programs  
276 were generally alternating between drug classes (figure 1D). Noticeably, a limited fraction of  
277 premises (n=6) reported off-license use of anthelmintics (figure 1D). These involved  
278 ivermectin (n=3), doramectin (n=2) or praziquantel (n=2) licensed for ruminants and were  
279 found in premises seeking advice from their veterinarians (5 out of 6 premises).  
280 Anthelmintics were bought from veterinarians in 62% of cases (figure 1D), while three and  
281 16 managers reported buying from the internet or their pharmacist, respectively. For this  
282 latter case, three managers only reported the need of their veterinarian's prescription.  
283 FEC-based drenching regimen was implemented in 14 premises (figure 1D).  
284 Despite stud farm managers were not more independent in the management of health-related  
285 issues than riding school managers (p=0.12), they relied more on their veterinarian's advice  
286 for drenching in comparison to their counterparts (p=2x10<sup>-4</sup>).

287

### 288 **3.2. Results of anthelmintic efficacy tests**

289 A total of 688 horses from 39 premises were sampled at least once during this experiment.  
290 This design provided enough resolution to detect prevalence as low as 1%, with precision of  
291 0.05 and assuming FEC sensitivity of 70% and specificity of 90%.

292 Out of these, 601 horses excreting more than 150 epg before treatment were enrolled for the  
293 anthelmintic resistance test (Table 1, supplementary Tables 2 and 3). Control groups were  
294 available in 24 out of the 39 retained farms (Table 1). Average FEC before treatment was 912  
295 ± 762 epg (supplementary Table 2).

296 Estimated ERRs and associated variation have been reported in Table 1 while farm-level  
297 estimated ERR have been attached as supplementary data 3. ERRs of the two implemented  
298 methods show highly consistent results for ivermectin and fenbendazole (Pearson's

299 correlation coefficient of 100 and 82%, respectively). This correlation however dropped to  
300 65% for pyrantel.

301 Estimated ERRs demonstrated the almost generalized inefficacy of fenbendazole with an  
302 average ERRs of 46.2% (sd=33.5%) or 42.8% (sd = 33.4%) for method 1 and 2, respectively  
303 and confidence intervals not including 100% efficacy in Burgundy and Aquitaine (Table 1).  
304 Nevertheless, two riding schools and one stud farm located in Normandy exhibited ERRs of  
305 at least 90% (supplementary data 3).

306 Observed trends for ivermectin were the exact opposite of these, as the mean estimated ERRs  
307 were 98.1% (sd: 8.6%) and 96.3% (sd: 14.5%) according to methods 1 and 2, respectively  
308 (Table 1, supplementary data 3). Seven horses from three riding schools and three stud farms  
309 exhibited ERRs lower than 90% after ivermectin treatment, resulting in bigger confidence  
310 intervals in Aquitaine and Normandy (Table 1). Egg reappearance was investigated 30 days  
311 after ivermectin drenching in 157 horses. Nine horses encountered in Aquitaine (n=5),  
312 Burgundy (n=3) and Loire Valley excreted eggs (mean FEC of 14.6 epg), three of which  
313 displaying egg excretion levels above 50% of their initial excretion before treatment.

314 Pyrantel exhibited an intermediate profile in comparison to the two other drugs as average  
315 ERRs were close to the 90% threshold, *i.e.* 92.5% (sd: 15.4%) and 90.3% (sd: 19.6%) for  
316 methods 1 and 2, respectively.

317

### 318 **3.3. Risk factors associated with anthelmintic efficacy**

319 Questionnaire data were combined with individual FEC measures to investigate what  
320 management practices underpinned the measured anthelmintic efficacy. Relative risks of  
321 reduced egg reduction rate (ERR) associated with management practices were estimated  
322 across drug categories, any relative risk above 1 signing increased egg count after treatment

323 and thus better ERR. Drug-specific risk factors were subsequently estimated considering  
324 observations from each treatment group independently.

325

### 326 **3.3.1. Risk-factors across anthelmintic drug class**

327 A first analysis investigated universal factors associated with drug efficacy, measured by  
328 ERR, that would be true across anthelmintic drugs and would not depend on drug mode of  
329 action. Relative risks associated with the retained variables have been plotted on figure 2.

330 As expected from the estimated ERRs, PYR and IVM were less at risk of reduced ERRs than  
331 FBZ considered as the reference level (figure 2). Premises in Aquitaine region had slightly  
332 more risk of drug resistance (OR=1.68, p=0.07) contrasting Loire Valley where ERRs were  
333 generally lower (OR=0.59, p=0.08), but the premise type was not retained as a variable  
334 contributed to ERR (figure 2).

335 Premises with higher horse-to-worker ratios were less prone to reduced ERRs (OR=0.36  
336 [0.19;0.67] and 0.53 [0.33;0.86] for intermediate and highest horse-to-worker ratios  
337 respectively). Outdoor-only breeding systems were associated with reduced ERRs (figure 2)  
338 and premises with rare horse movement were less at risk of drug resistance (OR=0.42  
339 [0.26;0.69]) in contrast to premises with occasional horse movements (OR=2.82 [1.54;5.17]).  
340 Pasture management had a major impact on ERRs, especially premises performing manure  
341 spreading (OR=1.88 [1.03;3.48]) were more at risk of reduced ERRs. In addition, closed  
342 pasture systems, *i.e.* with little or no rotation between pastures (OR= 7.56 [3.30;17.27] and  
343 2.48 [1.53;5.17] respectively) or premises with pastures dedicated to horses only (OR=1.71  
344 [1.09;2.70]), were more at risk of displaying reduced ERRs (figure 2).

345 On the contrary premises with highest veterinary expenses per horse (OR=0.53 [0.31;0.91])  
346 or managers more independent in horse health management (OR=0.53 [0.31;0.89]) were  
347 significantly less at risk of reduced ERRs (figure 2). Similarly, drenching strategy relying on

348 FEC or estimating drenching dose on an individual basis respectively diminished the risk of  
349 decreased ERRs by factors 1.72 and 2.56 (figure 2). Surprisingly, premises seeking advice  
350 from their practitioners for the design of their drenching program also displayed reduced drug  
351 efficacy (OR=3.36 [2.00;5.64], figure 2).

352

### 353 **3.3.2. Drug-specific risk factors**

354 As each of the tested anthelmintic drug have different modes of action, we examined the  
355 contribution of management practice to their respective ERRs by applying the marginal  
356 modelling approach to each subset of FBZ- and PYR-treated individuals (figure 3). Although  
357 this strategy dampens the power of the analysis as drug-specific estimates were inflated in  
358 comparison to the across-drug analysis (figure 3), it gives insight into putative drug-specific  
359 risk factors.

360 Despite this, most of the retained variables did not differ from the across-drug analysis and  
361 underlined the importance of pasture management on drug efficacy (figure 3). Both FBZ and  
362 PYR-ERRs were reduced by pasture systems with rarest pasture rotations and risk of sub-  
363 optimal ERRs was found in premises seeking advice from their veterinarians in both cases  
364 (figure 3). As for the across-drug analysis, ERR had less chance of being reduced in premises  
365 with higher horse-to-worker ratio although this was not significant for FBZ ( $p>0.06$  for both  
366 tested ratios, figure 3).

367 However, while FBZ resistance had not geographical pattern (variable not retained by the  
368 variable selection procedure, figure 3), Aquitaine displayed the highest risk of reduced PYR-  
369 efficacy (OR=7.02 [1.96;25.2]). In addition, seasonal grazing increased the risk of FBZ-  
370 resistance (OR=1.75 [1.13;2.72]) but dampened it for PYR (OR=0.14 [0.06;0.35]), whereas  
371 three-treatment drenching programs had a beneficial effect on FBZ efficacy (OR=0.55



372 [0.33;0.93], figure 3) but increased the risk of PYR resistance (OR=30.54 [9.77;95.5], figure  
373 3) in comparison to two-treatment programs.

374 Premises with managers more independent for health management issues also had less risk of  
375 FBZ-ERR (OR=0.46 [0.29;0.75]) whereas premises with the lowest veterinary expenses per  
376 horse had increased risk of reduced FBZ ERR (OR=2.26 [1.23;4.15]). Noticeably, most  
377 extreme veterinary expenses were associated with lower risk of PYR-resistance ( $p < 10^{-4}$  in  
378 both cases).

379

380

## 381 **4. Discussion**

382 Current knowledge about anthelmintic resistance in equine strongyles is usually scattered  
383 across drug efficacy reports and questionnaire surveys about parasite management (Nielsen,  
384 2012). This leaves a major knowledge gap in the critical assessment of factors underpinning  
385 anthelmintic resistance in equids. Our study aims to fill in this gap with the first report of an  
386 association between anthelmintic ERRs and management practices in horses.

387 The drug efficacy landscape in the present study remains similar to what has been reported in  
388 a previous study in France (Traversa et al., 2012) and what has been described in other  
389 countries (Matthews, 2014). As a summary, FBZ cannot be used for the management of small  
390 strongyles any more, in contrast to IVM whose efficacy remains above 95% and the  
391 intermediate pattern for PYR whose average ERRs is centred on the minimal efficacy level,  
392 *i.e.* 90% reduction of egg excretion.

393 However, two original findings tend to depart from this general pattern. First, a few premises  
394 (3/39) still harbour FBZ-susceptible strongyle populations as reported in a previous study  
395 (1/18) conducted in France (Traversa et al., 2012). Although knowledge of implemented  
396 management practices was available in the latter study, it was not possible to identify obvious  
397 consistent factor that would explain this sustained FBZ efficacy. In-depth investigation of  
398 practices and analysis of parasitic community structure with a nemabiome approach  
399 (Avramenko et al., 2015) may help better understanding this feature and confirm this FBZ-  
400 susceptibility by interrogating beta-tubulin sequences and allelic frequencies (Lake et al.,  
401 2009). Second, measured ERP tend to show that IVM efficacy may not be sustained at its  
402 current level in the near future despite the short time interval monitored. Indeed, larger ERR  
403 confidence intervals were encountered in Normandy and Aquitaine, suggestive of a higher  
404 variability in ERR. In addition, original ERP was 9 weeks for ivermectin (Boersema et al.,  
405 1996) but indications of shortened ERP have been collected in various countries, *e.g.*

406 Germany (von Samson-Himmelstjerna et al., 2007), the UK (Daniels and Proudman, 2016),  
407 Belgium, the Netherlands and Italy (Geurden et al., 2014) and had never been reported in  
408 France. In this study, ERP remains more qualitative than truly quantitative as the short time-  
409 interval considered will underestimate real ERP. This reduced time interval had been  
410 considered to minimize interferences of our design with premise activities and to ensure that  
411 most of the treated horses would still be available for sampling. Despite this, a few horses  
412 had already been sold or sent to other premises for training.

413 Beyond the crude estimation of drug efficacy, this study aimed to identify major determinants  
414 underpinning egg reduction rate, and to estimate their respective relative contributions to  
415 provide evidence-based recommendations in the field.

416 While the overall resistance pattern between drugs remains similar to current knowledge, it is  
417 worth noticing that significant regional variations were found. Especially, Loire Valley was  
418 generally less at risk of resistance whereas Aquitaine premises were particularly at risk both  
419 across drugs and for pyrantel resistance. This should encourage practitioners to implement  
420 more drug efficacy tests in this latter region. That difference may also result from more  
421 sustained practices but contribution of climatic conditions to maintain larger refugium (van  
422 Wyk, 2001) than in Aquitaine (hot and dry summer), hence dampening selection for drug  
423 resistance.

424 Pasture-related variables were also significant contributors to the variation in drug efficacy  
425 measured by egg reduction rate. Reduced anthelmintic efficacy were found in premises with  
426 closed pasture system, *i.e.* private pastures dedicated to horses only, with little or no rotation  
427 between pastures, and with outdoor breeding system. It is probable that such setting favours  
428 parasite development by a constant renewal of generations with dense host populations. Once  
429 a more resistant population arises it will have high chance to be maintained and be selected  
430 for as no dilution (into other host species for instance) will be permitted. In addition, a

431 decrease of egg reduction rate was over-represented in premises implementing manure  
432 spreading. This in combination with the other factors certainly helps scattering resistant  
433 populations across pasture surface and increases the chance of horse exposure to these.  
434 However, it seems that premises with a grazing surface larger than 80 ha are prone to harbour  
435 more pyrantel-resistant parasite populations. Pasture surface may hence not contribute  
436 enough to minimize resistant parasite replication.

437 Frequency of horse movements was also a major determinant of drug efficacy as premises  
438 with rare movements had less chance of reduced drug efficacy than premises with monthly  
439 movements. Animal movement is a major determinant of gene flow between strongylid  
440 populations and certainly contributes to the spreading of drug resistance alleles across sites  
441 (Blouin et al., 1995). Despite the apparent benefit to minimal horse movements, premises  
442 with monthly movements had less risk of reduced efficacy than premises with occasional  
443 movements. While solving this incongruence is difficult with current data, monthly  
444 movements may be quicker hence reducing the chance for contaminating pastures. In  
445 addition, the implementation of drenching or quarantine or both upon arrival did not  
446 contribute enough to drug efficacy to be retained by the variable selection procedure. While  
447 such quarantine may prevent the diffusion of drug resistant populations, the beneficial  
448 justification of this strategy hence remains unresolved by our data. A lack of statistical power  
449 cannot be ruled out as only 39 farms were available for this survey.

450 Interestingly, higher drenching frequency, *i.e.* one treatment every 3 or 4 months,  
451 significantly increased the risk of pyrantel resistance which was neither the case for lower  
452 treatment pressure (one every 6 to 12 months) advocating for reduced treatment pressure.

453 While these factors should be considered in the field to guide the implementation of thorough  
454 monitoring of parasite resistance, other factors favouring sustained anthelmintic efficacy  
455 were identified. Noticeably, FEC-based drenching programs and determination of drug dose

456 on an individual basis were significantly associated with higher drug efficacy across drugs,  
457 especially for fenbendazole. Both practices have long been advocated for in ruminant and  
458 equine systems as a sustainable parasite management practices, as the former is thought to  
459 reduce selection pressure (Kenyon et al., 2009) and the latter is thought to prevent under  
460 dosing whose impact on drug resistance development relies on many parameters (Silvestre et  
461 al., 2001; Smith et al., 1999). Our findings provided strong evidence to promote their  
462 enforcement in the field.

463 In addition, risk for drug resistance decreased with higher horse-to-worker ratios which may  
464 indicate an overall better management in these premises, corroborated by the better ERR  
465 measured in premises where managers were more independent in managing health problems.  
466 Overall, these indicators of more specialized or experimented managers could constitute good  
467 predictors for implementing drug resistance testing.

468 Importantly, veterinary expenses were a significant driver of drug efficacy, premises  
469 spending more having less chance of reduced efficacy across drugs, whereas premises with  
470 less than 100€ per horse per year had more risk of drug resistance, especially for  
471 fenbendazole that is the cheapest anthelmintic available. This association may hence reveal  
472 the more frequent use of fenbendazole in premises with lower expenses. Also, four out of 6  
473 premises reporting off-licence use of anthelmintics did not spend more than 200€ per horse  
474 per year. This indication of collinearity between the two variables may explain why off-  
475 license use of drugs was not retained by the variable selection procedure. While off-license  
476 use of anthelmintics is certainly driven by financial interests, *i.e.* the buying of cheaper  
477 ruminant-dedicated products, its practice may lead to sub-optimal drug concentrations that  
478 usually favour the emergence of resistant populations (Day and Read, 2016) and could  
479 explain the trend between expenses and resistance risk. However, off-license uses generally  
480 involved doramectin. Although cross-resistance between ivermectin and doramectin could be

481 involved as already described in ovine parasitic nematodes (Martinez-Valladares et al.,  
482 2012), the impact of doramectin use on other drug efficacy is less probable as current  
483 knowledge of molecular bases of drug resistance leaves only minor room for overlap between  
484 fenbendazole, pyrantel and macrocyclic lactone resistance (Kotze et al., 2014).  
485 Surprisingly, off-license use of drugs was generally found in premises seeking advice from  
486 their veterinarians for parasite management. Our findings also suggest that premises relying  
487 on their veterinarians for their drenching regimen design exhibited reduced drug efficacy.  
488 These two findings need cautious interpretation and the latter association may be the  
489 consequence of identified problematic parasite control by managers who ultimately ask their  
490 veterinarians for advice. Recent study in the UK suggests that practitioners may provide  
491 useful advice on drug use (Easton et al., 2016) and thus reinforce their role in sustainable  
492 parasite control. However, a sub-optimal awareness of veterinarians in integrated  
493 management of strongyles in France cannot entirely be ruled-out (Sallé and Cabaret, 2015).  
494

495 **Conclusions**

496 This study reports the first risk estimation analysis between management practices and drug  
497 efficacy in equine strongyles. While drug resistance prevalence remains in agreement with  
498 previous surveys from France and other countries, *i.e.* a generalized failure of fenbendazole, a  
499 decreasing efficacy of pyrantel and reasonably high efficacy of ivermectin despite evidence  
500 of reduced egg reappearance period. Most importantly, we have quantified the relative risks  
501 and benefits associated with equine farms management practices. These estimations provide  
502 robust support to advocate for FEC-based treatment regimens as well as individual  
503 determination of anthelmintic dose. In addition, horse movements were a significant  
504 contributor of drug resistance suggesting that better control and management of these  
505 movements should be recommended. The horse-to-worker ratio may also be an indicator of  
506 better efficacy. On the contrary, outdoor-breeding systems, grazing systems with little  
507 rotation and manure spreading increased the risk of reduced drug efficacy.  
508 These first insights into determinants of drug efficacy only focused on environmental factors,  
509 putting aside intrinsic worm characteristics, like species composition, that should be  
510 investigated further. Recent advances in parasite metagenomics would help addressing this  
511 question.

512 **Figure 1. Environmental variables and respective level frequency observed from**  
513 **questionnaire data**

514 Retained variables for association with infection status and egg reduction rate and their  
515 respective level frequencies have been plotted for questions related to premise major features  
516 (A), pasture description and management (B), horse health management (C) and parasite  
517 management strategies (D). For each variable, levels and their cumulative occurrence in  
518 questionnaire data have been represented with a different colour.

519

520 **Figure 2. Risk factors associated with drug efficacy across drug class**

521 For each of the retained management practice, the relative risk of reduced (below 1) or  
522 increased (higher than 1) Egg Reduction Rate (ERR) is plotted. Each dot stands for the mean  
523 odd ratio associated to the considered variable, relative to a reference level specific to each  
524 variable. Associated 95% confidence intervals are represented as horizontal lines. The  
525 vertical grey line stands for an odd ratio of 1, *i.e.* no risk difference. Any variable whose  
526 confidence interval does not cross the vertical line is significantly affecting the measured  
527 ERR. Colours have been chosen to distinguish between variables relative to premise  
528 description (light green), horse movements (green), pasture management (blue), health  
529 management (pink) and parasite management (red).

530

531 **Figure 3. Risk-factors associated with drug-specific efficacy rate**

532 A drug-specific risk analysis has been performed to identify risk specifically impacting on  
533 fenbendazole (A) and pyrantel (B) Egg Reduction Rate (ERR). Figure interpretation is the  
534 same as for figure 2.

535

536

537



538 **Table 1. Average Egg Reduction Rate estimated across premise type and regions**

| Region              | Ivermectin |            |            | Pyrantel      |            |            | Fenbendazole  |          |          |               |
|---------------------|------------|------------|------------|---------------|------------|------------|---------------|----------|----------|---------------|
|                     |            | RS*        | SF*        | Across region | RS         | SF         | Across region | RS       | SF       | Across region |
| Aquitaine           | N          | 3          | 3          | 6             | 3          | 3          | 6             | 3        | 3        | 6             |
|                     | mean       | 100        | 99.9       | 99.9          | 75.3       | 86.7       | 81            | 18.8     | 63       | 40.9          |
|                     | sd         | 0          | 0.1        | 0.1           | 39.5       | 16.4       | 27.8          | 32.5     | 41.1     | 41.1          |
|                     | CI         | [100-100]  | [91.8-100] | [97.6-100]    | [39.4-100] | [41.3-100] | [0-100]       | [0-87]   | [0-98.9] | [0-98.3]      |
| Burgundy            | N          | 3          | 4          | 7             | 3          | 4          | 7             | 3        | 4        | 7             |
|                     | mean       | 99.8       | 89.5       | 93.9          | 99.2       | 96.3       | 97.6          | 31.2     | 55.9     | 45.3          |
|                     | sd         | 0.3        | 21.1       | 15.9          | 1.4        | 4.3        | 3.5           | 27.9     | 26       | 27.8          |
|                     | CI         | [99.4-100] | [0-100]    | [0-100]       | [100-100]  | [83.6-100] | [51.4-100]    | [0-77.5] | [0-96.9] | [0-97.1]      |
| Loire Valley        | N          | 3          | 3          | 6             | 3          | 3          | 6             | 3        | 3        | 6             |
|                     | mean       | 100        | 100        | 100           | 97.2       | 93.3       | 95.2          | 32.5     | 68.2     | 50.4          |
|                     | sd         | 0          | 0          | 0             | 2.6        | 9.3        | 6.5           | 29.6     | 9.6      | 27.8          |
|                     | CI         | [100-100]  | [100-100]  | [100-100]     | [85.3-100] | [50-100]   | [19.6-100]    | [0-78.6] | [0-100]  | [0-100]       |
| Normandy            | N          | 2          | 3          | 5             | 2          | 3          | 5             | 2        | 3        | 5             |
|                     | mean       | 99         | 99.9       | 99.5          | 90.8       | 99.3       | 95.9          | 45.9     | 50.8     | 48.9          |
|                     | sd         | 1.4        | 0.2        | 0.9           | 12.3       | 1          | 7.7           | 64.9     | 46.9     | 46.5          |
|                     | CI         | [82.2-100] | [95-100]   | [0-100]       | [80.3-100] | [92.8-100] | [60.3-100]    | [0-100]  | [0-100]  | [0-100]       |
| Across premise type | N          | 11         | 13         | 24            | 11         | 13         | 24            | 11       | 13       | 24            |
|                     | mean       | 99.8       | 96.7       | 98.1          | 90.6       | 94.1       | 92.5          | 30.8     | 59.2     | 46.2          |
|                     | sd         | 0.6        | 11.7       | 8.6           | 20.8       | 9.3        | 15.4          | 32.5     | 29.6     | 33.5          |
|                     | CI         | [98.8-100] | [95.2-100] | [95-100]      | [39.4-100] | [58.9-100] | [41.3-100]    | [0-92.3] | [0-100]  | [0-100]       |

539

540

541

542

543 **Table 1 continued**

| Region                                   |              | Ivermectin |            |            | Pyrantel   |            |            | Fenbendazole |          |          |          |
|------------------------------------------|--------------|------------|------------|------------|------------|------------|------------|--------------|----------|----------|----------|
| Method 2: FECRT = 100 x (1 - FEC14/FEC0) | Aquitaine    | N          | 7          | 6          | 13         | 7          | 6          | 13           | 7        | 6        | 13       |
|                                          |              | mean       | 100        | 98.7       | 99.4       | 93.8       | 73.4       | 84.4         | 13.9     | 51.6     | 31.3     |
|                                          |              | sd         | 0          | 2.9        | 2          | 6.9        | 36.2       | 26.1         | 14.7     | 41.8     | 34.9     |
|                                          |              | CI         | [100-100]  | [70.8-100] | [79.2-100] | [0-100]    | [0-100]    | [0-100]      | [0-79.6] | [0-98.7] | [0-98.5] |
|                                          | Burgundy     | N          | 4          | 4          | 8          | 4          | 4          | 8            | 4        | 4        | 8        |
|                                          |              | mean       | 99.6       | 88.1       | 93.8       | 98.9       | 95.6       | 97.3         | 22.3     | 42.5     | 32.4     |
|                                          |              | sd         | 0.5        | 23.8       | 16.8       | 1.5        | 4.8        | 3.7          | 30.2     | 37       | 33.1     |
|                                          |              | CI         | [96.3-100] | [0-100]    | [0-100]    | [91.4-100] | [78.6-100] | [78.6-100]   | [0-88.2] | [0-92.4] | [0-92.4] |
|                                          | Loire Valley | N          | 4          | 4          | 8          | 4          | 4          | 8            | 4        | 4        | 8        |
|                                          |              | mean       | 100        | 79.5       | 89.8       | 96.5       | 74.1       | 85.3         | 36.1     | 60.9     | 48.5     |
|                                          |              | sd         | 0          | 41         | 29         | 2.4        | 33.8       | 25.2         | 15.2     | 15.5     | 19.4     |
|                                          |              | CI         | [100-100]  | [0-100]    | [0-100]    | [87.7-100] | [26.7-100] | [26.7-100]   | [0-78.6] | [0-100]  | [0-100]  |
|                                          | Normandy     | N          | 5          | 5          | 10         | 5          | 5          | 10           | 5        | 5        | 10       |
|                                          |              | mean       | 99.4       | 99.9       | 99.6       | 97.5       | 95.5       | 96.5         | 83.4     | 39.7     | 61.6     |
|                                          |              | sd         | 1.3        | 0.2        | 0.9        | 3.2        | 8.9        | 6.4          | 18.2     | 36.2     | 35.5     |
|                                          |              | CI         | [60-100]   | [99.2-100] | [99.2-100] | [85.1-100] | [38.7-100] | [85.1-100]   | [0-100]  | [0-100]  | [0-100]  |
| Across premise type                      | N            | 20         | 19         | 39         | 20         | 19         | 39         | 20           | 19       | 39       |          |
|                                          | mean         | 99.8       | 92.7       | 96.3       | 96.3       | 84         | 90.3       | 37.4         | 48.5     | 42.8     |          |
|                                          | sd           | 0.7        | 21.1       | 15         | 4.8        | 26.5       | 19.6       | 33.6         | 33.3     | 33.5     |          |
|                                          | CI           | [96.3-100] | [0-100]    | [79.2-100] | [52.6-100] | [38.7-100] | [39.7-100] | [0-100]      | [0-100]  | [0-100]  |          |

544

545 Drug-specific average Egg Reduction Rates (mean) and standard deviations (sd) measured 14 days after treatment have been collated for each  
 546 drug and region of interest for the two egg reduction rate calculation methods used. Cross-sectional confidence intervals N indicates the number  
 547 of premises available, while RS and SF stand for riding-school and stud farm respectively.

- 548 **Supplementary Data 1. Retained variables and data distribution across premises**
- 549 **Supplementary Data 2. Average faecal egg count by premise type and region before**  
550 **anthelmintic treatment**
- 551 **Supplementary Data 3. Farm-level egg reduction rates with associated confidence**  
552 **intervals**
- 553 **Supplementary Data 4. Estimated relative risks associated with every retained**  
554 **environmental variable with associated confidence intervals**

555 **Acknowledgements**

556 Authors are greatly indebted to the premise managers who took part to this study and gave us  
557 access to their stud or riding schools. We would like to acknowledge Pr. C. Chartier for  
558 kindly granting access to his parasitology laboratory, Dr. C. Laugier for discussing the  
559 questionnaire and Dr. L. Crespin for critical comments on this manuscript. We also would  
560 like to acknowledge the technical support of Dr. C. Charvet, C. Koch and C. Musset during  
561 this survey. This work has been funded by the French Institute for Horse and Horse Riding  
562 (IFCE) and the Fonds Eperon fund for horse racing (BIOREQUI project), as well as the  
563 Merial and Zoetis companies.

564

565

## 566 **References**

- 567 Avramenko, R.W., Redman, E.M., Lewis, R., Yazwinski, T.A., Wasmuth, J.D., Gilleard, J.S.,  
568 2015. Exploring the Gastrointestinal "Nemabiome": Deep Amplicon Sequencing to Quantify  
569 the Species Composition of Parasitic Nematode Communities. *PLoS One* 10, e0143559.
- 570 Blouin, M.S., Yowell, C.A., Courtney, C.H., Dame, J.B., 1995. Host movement and the genetic  
571 structure of populations of parasitic nematodes. *Genetics* 141, 1007-1014.
- 572 Boersema, J.H., Eysker, M., Maas, J., vanderAar, W.M., 1996. Comparison of the  
573 reappearance of strongyle eggs in foals, yearlings, and adult horses after treatment with  
574 ivermectin or pyrantel. *Vet Quart* 18, 7-9.
- 575 Canever, R.J., Braga, P.R., Boeckh, A., Grycajuck, M., Bier, D., Molento, M.B., 2013. Lack of  
576 *Cyathostomin* sp. reduction after anthelmintic treatment in horses in Brazil. *Vet Parasitol*  
577 194, 35-39.
- 578 Chernick, M.R., 1999. *Bootstrap Methods: A practitioner's guide*.
- 579 Coles, G.C., Bauer, C., Borgsteede, F.H., Geerts, S., Klei, T.R., Taylor, M.A., Waller, P.J., 1992.  
580 World Association for the Advancement of Veterinary Parasitology (W.A.A.V.P.) methods for  
581 the detection of anthelmintic resistance in nematodes of veterinary importance. *Vet*  
582 *Parasitol* 44, 35-44.
- 583 Coles, G.C., Jackson, F., Pomroy, W.E., Prichard, R.K., von Samson-Himmelstjerna, G.,  
584 Silvestre, A., Taylor, M.A., Vercruyse, J., 2006. The detection of anthelmintic resistance in  
585 nematodes of veterinary importance. *Vet Parasitol* 136, 167-185.
- 586 Corbett, C.J., Love, S., Moore, A., Burden, F.A., Matthews, J.B., Denwood, M.J., 2014. The  
587 effectiveness of faecal removal methods of pasture management to control the  
588 *cyathostomin* burden of donkeys. *Parasit Vectors* 7, 48.
- 589 Corning, S., 2009. Equine *cyathostomins*: a review of biology, clinical significance and  
590 therapy. *Parasit Vectors* 2 Suppl 2, S1.
- 591 Crellen, T., Walker, M., Lamberton, P.H., Kabatereine, N.B., Tukahebwa, E.M., Cotton, J.A.,  
592 Webster, J.P., 2016. Reduced Efficacy of Praziquantel Against *Schistosoma mansoni* Is  
593 Associated With Multiple Rounds of Mass Drug Administration. *Clin Infect Dis* 63, 1151-  
594 1159.
- 595 Daniels, S.P., Proudman, C.J., 2016. Shortened egg reappearance after ivermectin or  
596 moxidectin use in horses in the UK. *Vet J* 218, 36-39.
- 597 Dash, K.M., Hall, E., Barger, I.A., 1988. The role of arithmetic and geometric mean worm egg  
598 counts in faecal egg count reduction tests and in monitoring strategic drenching programs in  
599 sheep. *Aust Vet J* 65, 66-68.
- 600 Day, T., Read, A.F., 2016. Does High-Dose Antimicrobial Chemotherapy Prevent the  
601 Evolution of Resistance? *PLoS Comput Biol* 12, e1004689.
- 602 Easton, S., Pinchbeck, G.L., Tzelos, T., Bartley, D.J., Hotchkiss, E., Hodgkinson, J.E., Matthews,  
603 J.B., 2016. Investigating interactions between UK horse owners and prescribers of  
604 anthelmintics. *Prev Vet Med* 135, 17-27.
- 605 Fritzen, B., Rohn, K., Schnieder, T., von Samson-Himmelstjerna, G., 2010. Endoparasite  
606 control management on horse farms--lessons from worm prevalence and questionnaire  
607 data. *Equine Vet J* 42, 79-83.
- 608 Geurden, T., van Doorn, D., Claerebout, E., Kooyman, F., De Keersmaecker, S., Vercruyse, J.,  
609 Besognet, B., Vanimisetti, B., di Regalbono, A.F., Beraldo, P., Di Cesare, A., Traversa, D.,  
610 2014. Decreased strongyle egg re-appearance period after treatment with ivermectin and  
611 moxidectin in horses in Belgium, Italy and The Netherlands. *Vet Parasitol* 204, 291-296.

- 612 Hinney, B., Wirtherle, N.C., Kyule, M., Miethe, N., Zessin, K.H., Clausen, P.H., 2011a.  
613 Prevalence of helminths in horses in the state of Brandenburg, Germany. *Parasitol Res* 108,  
614 1083-1091.
- 615 Hinney, B., Wirtherle, N.C., Kyule, M., Miethe, N., Zessin, K.H., Clausen, P.H., 2011b. A  
616 questionnaire survey on helminth control on horse farms in Brandenburg, Germany and the  
617 assessment of risks caused by different kinds of management. *Parasitol Res* 109, 1625-1635.
- 618 Højsgaard S., H., U., Yan, J., 2006. The R Package geepack for Generalized Estimating  
619 Equations. *Journal of Statistical Software* 15, 1-11.
- 620 Humphry, R.W., Cameron, A., Gunn, G.J., 2004. A practical approach to calculate sample size  
621 for herd prevalence surveys. *Prev Vet Med* 65, 173-188.
- 622 Kaplan, R.M., Vidyashankar, A.N., 2012. An inconvenient truth: Global worming and  
623 anthelmintic resistance. *Veterinary Parasitology* 186, 70-78.
- 624 Kennedy, D.A., Read, A.F., 2017. Why does drug resistance readily evolve but vaccine  
625 resistance does not? *Proc Biol Sci* 284.
- 626 Kenyon, F., Greer, A.W., Coles, G.C., Cringoli, G., Papadopoulos, E., Cabaret, J., Berrag, B.,  
627 Varady, M., Van Wyk, J.A., Thomas, E., Vercruyse, J., Jackson, F., 2009. The role of targeted  
628 selective treatments in the development of refugia-based approaches to the control of  
629 gastrointestinal nematodes of small ruminants. *Vet Parasitol* 164, 3-11.
- 630 Kotze, A.C., Hunt, P.W., Skuce, P., von Samson-Himmelstjerna, G., Martin, R.J., Sager, H.,  
631 Krucken, J., Hodgkinson, J., Lespine, A., Jex, A.R., Gilleard, J.S., Beech, R.N., Wolstenholme,  
632 A.J., Demeler, J., Robertson, A.P., Charvet, C.L., Neveu, C., Kaminsky, R., Rufener, L.,  
633 Alberich, M., Menez, C., Prichard, R.K., 2014. Recent advances in candidate-gene and whole-  
634 genome approaches to the discovery of anthelmintic resistance markers and the description  
635 of drug/receptor interactions. *Int J Parasitol Drugs Drug Resist* 4, 164-184.
- 636 Lake, S.L., Matthews, J.B., Kaplan, R.M., Hodgkinson, J.E., 2009. Determination of genomic  
637 DNA sequences for beta-tubulin isotype 1 from multiple species of cyathostomin and  
638 detection of resistance alleles in third-stage larvae from horses with naturally acquired  
639 infections. *Parasites & Vectors* 2.
- 640 Lendal, S., Larsen, M.M., Bjorn, H., Craven, J., Chriel, M., Olsen, S.N., 1998. A questionnaire  
641 survey on nematode control practices on horse farms in Denmark and the existence of risk  
642 factors for the development of anthelmintic resistance. *Vet Parasitol* 78, 49-63.
- 643 Lichtenfels, J.R., Kharchenko, V.A., Dvojnjos, G.M., 2008. Illustrated identification keys to  
644 strongylid parasites (Strongylidae: Nematoda) of horses, zebras and asses (Equidae). *Vet*  
645 *Parasitol* 156, 4-161.
- 646 Lind, E.O., Rautalinko, E., Ugglä, A., Waller, P.J., Morrison, D.A., Hoglund, J., 2007. Parasite  
647 control practices on Swedish horse farms. *Acta Vet Scand* 49, 25.
- 648 Love, S., Murphy, D., Mellor, D., 1999. Pathogenicity of cyathostome infection. *Vet Parasitol*  
649 85, 113-121; discussion 121-112, 215-125.
- 650 Lyons, E.T., Tolliver, S.C., Ionita, M., Collins, S.S., 2008. Evaluation of parasitocidal activity of  
651 fenbendazole, ivermectin, oxbendazole, and pyrantel pamoate in horse foals with emphasis  
652 on ascarids (*Parascaris equorum*) in field studies on five farms in Central Kentucky in 2007.  
653 *Parasitol Res* 103, 287-291.
- 654 Maddox, T.W., Pinchbeck, G.L., Clegg, P.D., Wedley, A.L., Dawson, S., Williams, N.J., 2012.  
655 Cross-sectional study of antimicrobial-resistant bacteria in horses. Part 2: Risk factors for  
656 faecal carriage of antimicrobial-resistant *Escherichia coli* in horses. *Equine Vet J* 44, 297-303.

657 Martinez-Valladares, M., Famularo, M.R., Fernandez-Pato, N., Cordero-Perez, C., Castanon-  
658 Ordonez, L., Rojo-Vazquez, F.A., 2012. Characterization of a multidrug resistant *Teladorsagia*  
659 *circumcincta* isolate from Spain. *Parasitol Res* 110, 2083-2087.

660 Matthews, J.B., 2014. Anthelmintic resistance in equine nematodes. *Int J Parasitol Drugs*  
661 *Drug Resist* 4, 310-315.

662 Molento, M.B., Antunes, J., Bentes, R.N., Coles, G.C., 2008. Anthelmintic resistant  
663 nematodes in Brazilian horses. *Vet Rec* 162, 384-385.

664 Murphy, D., Love, S., 1997. The pathogenic effects of experimental cyathostome infections  
665 in ponies. *Vet Parasitol* 70, 99-110.

666 Nielsen, M.K., 2012. Sustainable equine parasite control: perspectives and research needs.  
667 *Vet Parasitol* 185, 32-44.

668 Nielsen, M.K., Jacobsen, S., Olsen, S.N., Bousquet, E., Pihl, T., 2016. Nonstrangulating  
669 intestinal infarction associated with *Strongylus vulgaris* in referred Danish equine cases.  
670 *Equine Vet J* 48, 376-379.

671 Nielsen, M.K., Vidyashankar, A.N., Olsen, S.N., Monrad, J., Thamsborg, S.M., 2012.  
672 *Strongylus vulgaris* associated with usage of selective therapy on Danish horse farms-is it  
673 reemerging? *Vet Parasitol* 189, 260-266.

674 O'Meara, B., Mulcahy, G., 2002. A survey of helminth control practices in equine  
675 establishments in Ireland. *Vet Parasitol* 109, 101-110.

676 Peregrine, A.S., Molento, M.B., Kaplan, R.M., Nielsen, M.K., 2014. Anthelmintic resistance in  
677 important parasites of horses: does it really matter? *Vet Parasitol* 201, 1-8.

678 R Core Team, 2016. R: A Language and Environment for Statistical Computing. R Foundation  
679 for Statistical Computing, Vienna.

680 Relf, V.E., Lester, H.E., Morgan, E.R., Hodgkinson, J.E., Matthews, J.B., 2014. Anthelmintic  
681 efficacy on UK Thoroughbred stud farms. *Int J Parasitol* 44, 507-514.

682 Relf, V.E., Morgan, E.R., Hodgkinson, J.E., Matthews, J.B., 2012. A questionnaire study on  
683 parasite control practices on UK breeding Thoroughbred studs. *Equine Vet J* 44, 466-471.

684 Sallé, G., Cabaret, J., 2015. A survey on parasite management by equine veterinarians  
685 highlights the need for a regulation change. *Vet Rec Open* 2, e000104.

686 Sallé, G., Cabaret, J., 2015. Meta-analysis of cyathostomins community structure and  
687 diversity, International Conference of the World Association for the Advancement of  
688 Veterinary Parasitology, Liverpool, The United-Kingdom, p. 220.

689 Silvestre, A., Cabaret, J., Humbert, J.F., 2001. Effect of benzimidazole under-dosing on the  
690 resistant allele frequency in *Teladorsagia circumcincta* (Nematoda). *Parasitology* 123, 103-  
691 111.

692 Slocombe, J.O., de Gannes, R.V., 2006. Cyathostomes in horses in Canada resistant to  
693 pyrantel salts and effectively removed by moxidectin. *Vet Parasitol* 140, 181-184.

694 Smith, G., Grenfell, B.T., Isham, V., Cornell, S., 1999. Anthelmintic resistance revisited:  
695 under-dosing, chemoprophylactic strategies, and mating probabilities. *Int J Parasitol* 29, 77-  
696 91; discussion 93-74.

697 Traversa, D., Castagna, G., von Samson-Himmelstjerna, G., Meloni, S., Bartolini, R., Geurden,  
698 T., Pearce, M.C., Woringer, E., Besognet, B., Milillo, P., D'Espois, M., 2012. Efficacy of major  
699 anthelmintics against horse cyathostomins in France. *Vet Parasitol* 188, 294-300.

700 Traversa, D., Klei, T.R., Iorio, R., Paoletti, B., Lia, R.P., Otranto, D., Sparagano, O.A.,  
701 Giangaspero, A., 2007. Occurrence of anthelmintic resistant equine cyathostome  
702 populations in central and southern Italy. *Prev Vet Med* 82, 314-320.

703 Traversa, D., von Samson-Himmelstjerna, G., Demeler, J., Milillo, P., Schurmann, S., Barnes,  
704 H., Otranto, D., Perrucci, S., di Regalbono, A.F., Beraldo, P., Boeckh, A., Cobb, R., 2009.  
705 Anthelmintic resistance in cyathostomin populations from horse yards in Italy, United  
706 Kingdom and Germany. *Parasit Vectors* 2 Suppl 2, S2.  
707 Tzelos, T., Barbeito, J.S., Nielsen, M.K., Morgan, E.R., Hodgkinson, J.E., Matthews, J.B., 2017.  
708 Strongyle egg reappearance period after moxidectin treatment and its relationship with  
709 management factors in UK equine populations. *Vet Parasitol* 237, 70-76.  
710 van Wyk, J.A., 2001. Refugia--overlooked as perhaps the most potent factor concerning the  
711 development of anthelmintic resistance. *Onderstepoort J Vet Res* 68, 55-67.  
712 von Samson-Himmelstjerna, G., Fritzen, B., Demeler, J., Schurmann, S., Rohn, K., Schnieder,  
713 T., Epe, C., 2007. Cases of reduced cyathostomin egg-reappearance period and failure of  
714 *Parascaris equorum* egg count reduction following ivermectin treatment as well as survey  
715 on pyrantel efficacy on German horse farms. *Vet Parasitol* 144, 74-80.  
716 Walker, M., Churcher, T.S., Basanez, M.G., 2014. Models for measuring anthelmintic drug  
717 efficacy for parasitologists. *Trends Parasitol* 30, 528-537.  
718



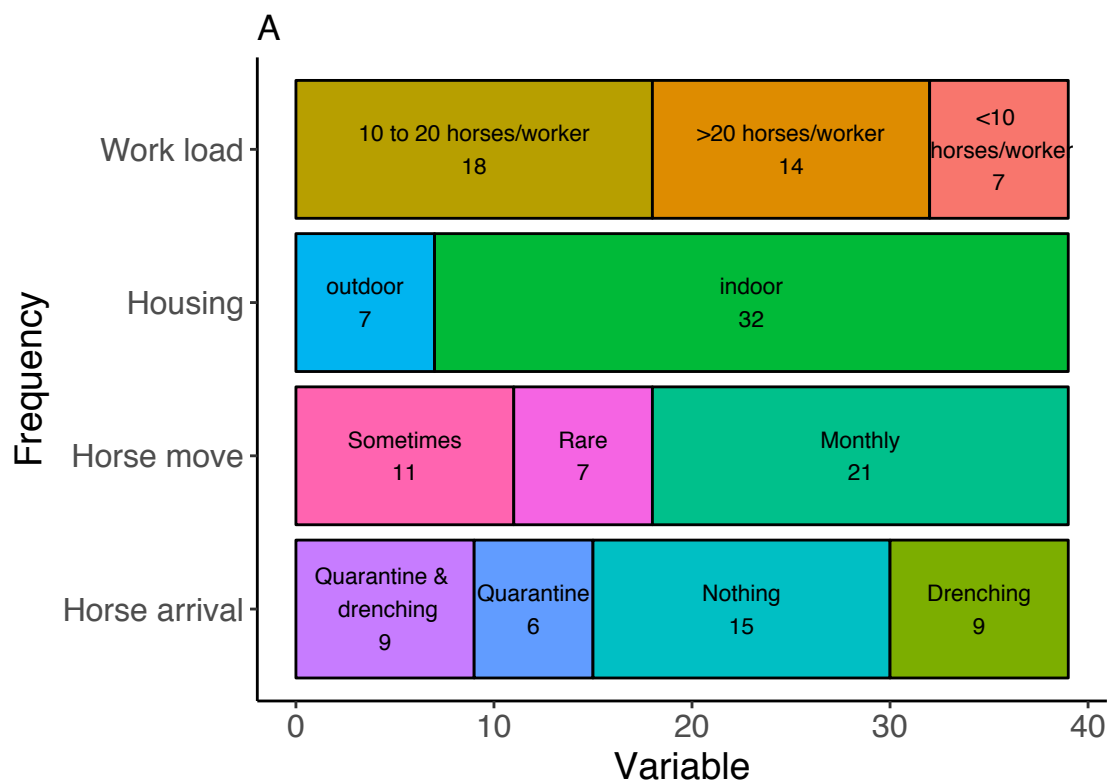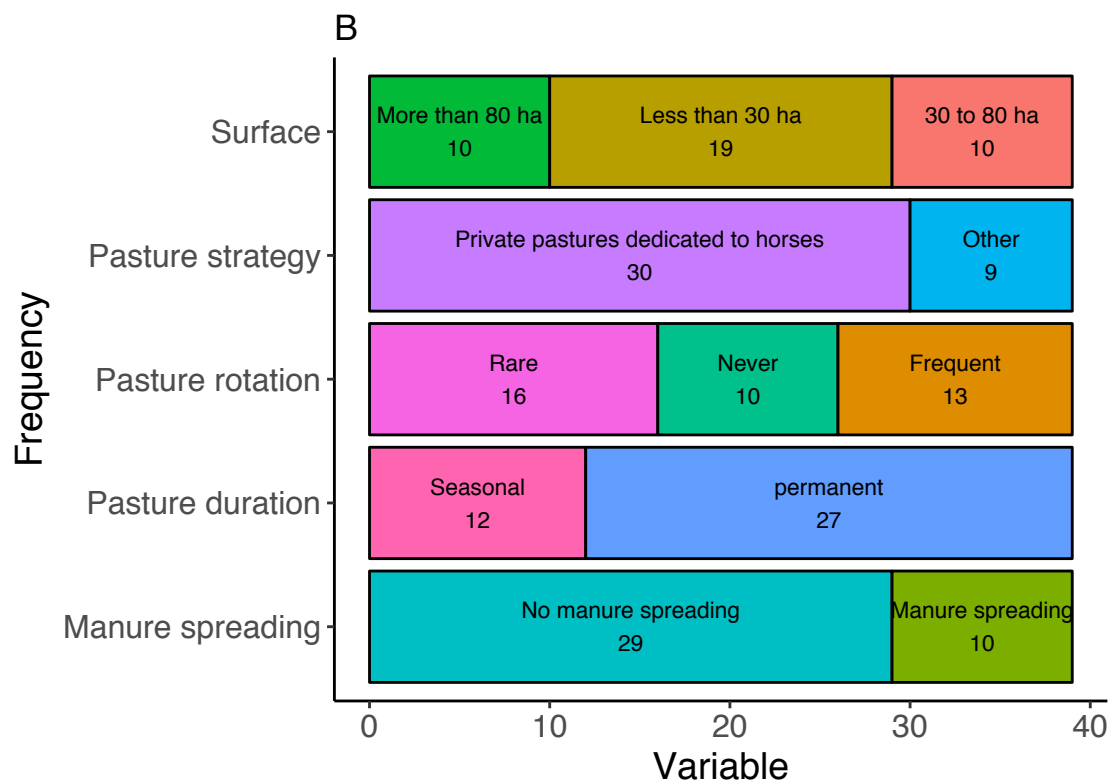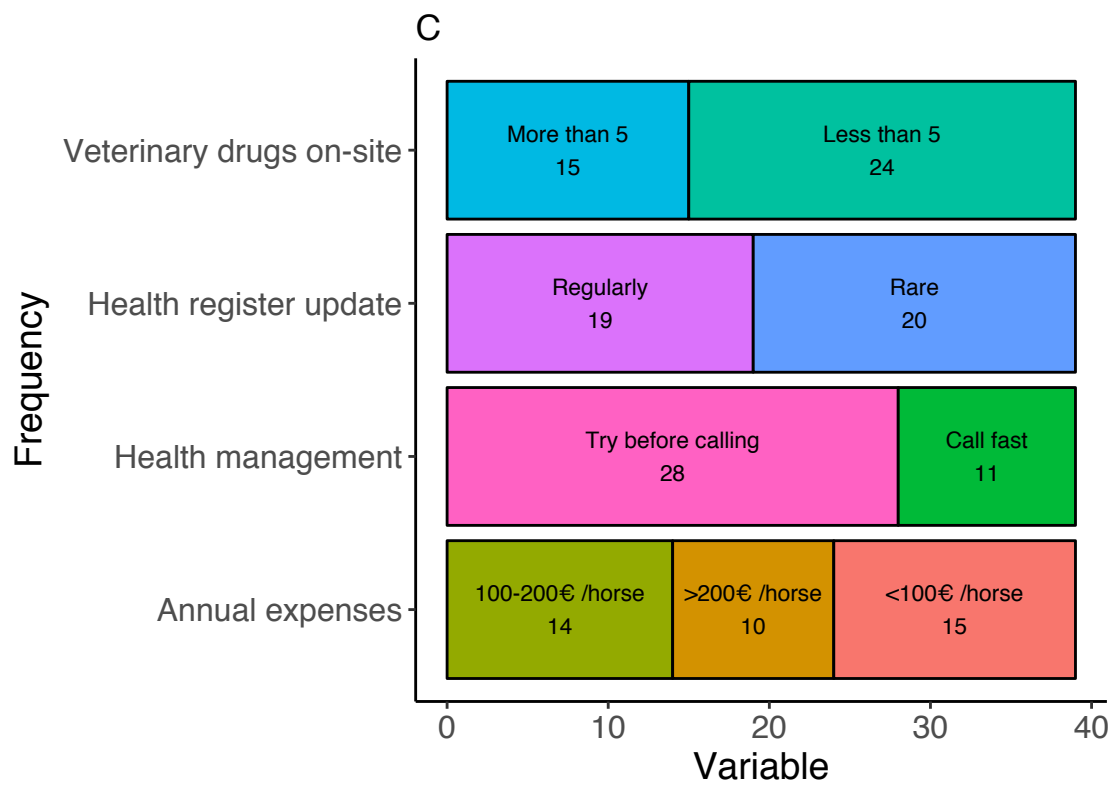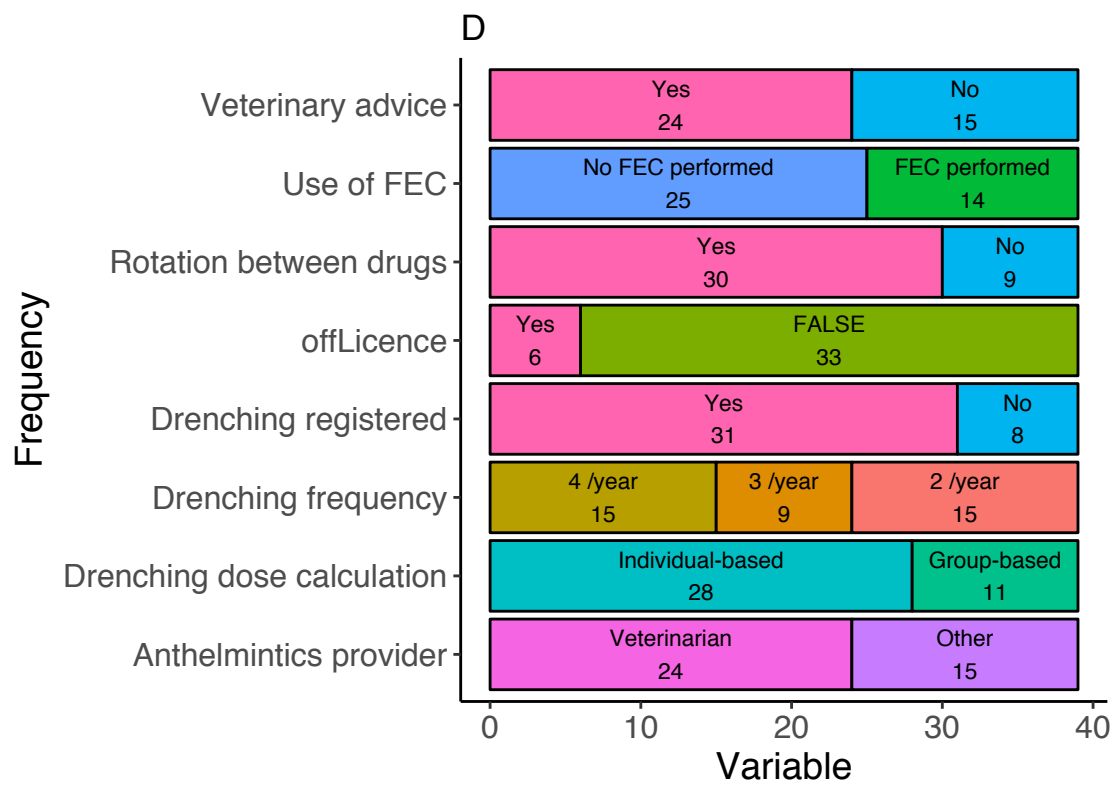

Environmental Variable

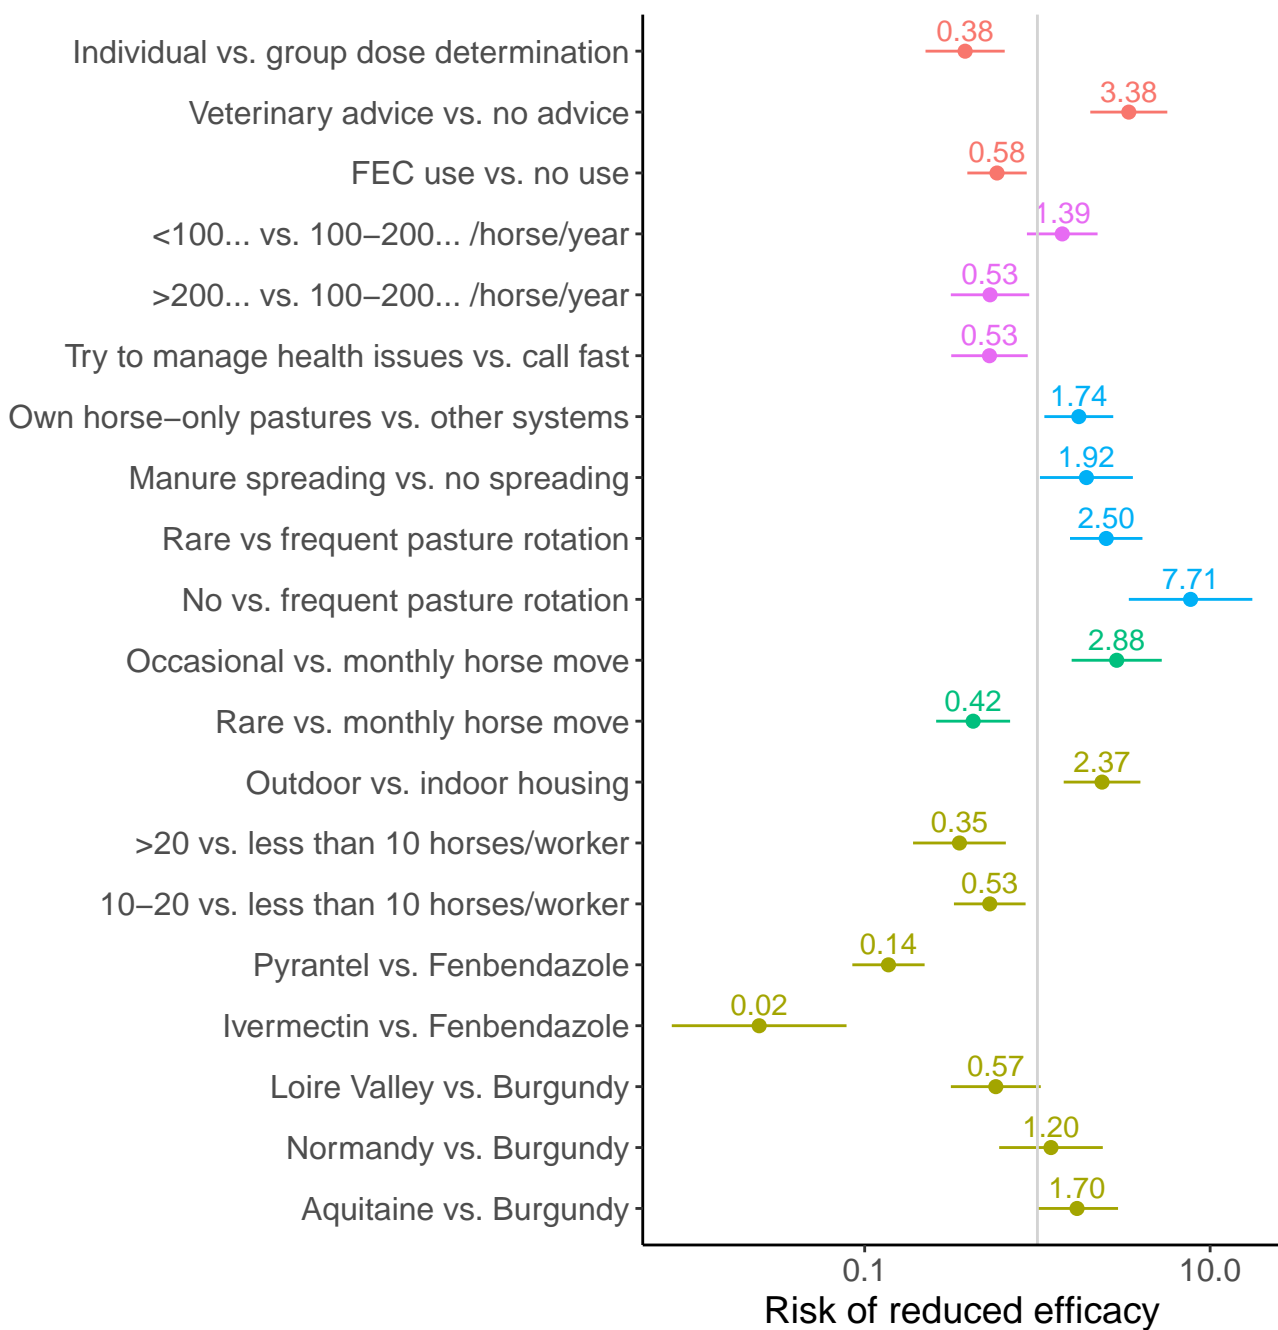

A

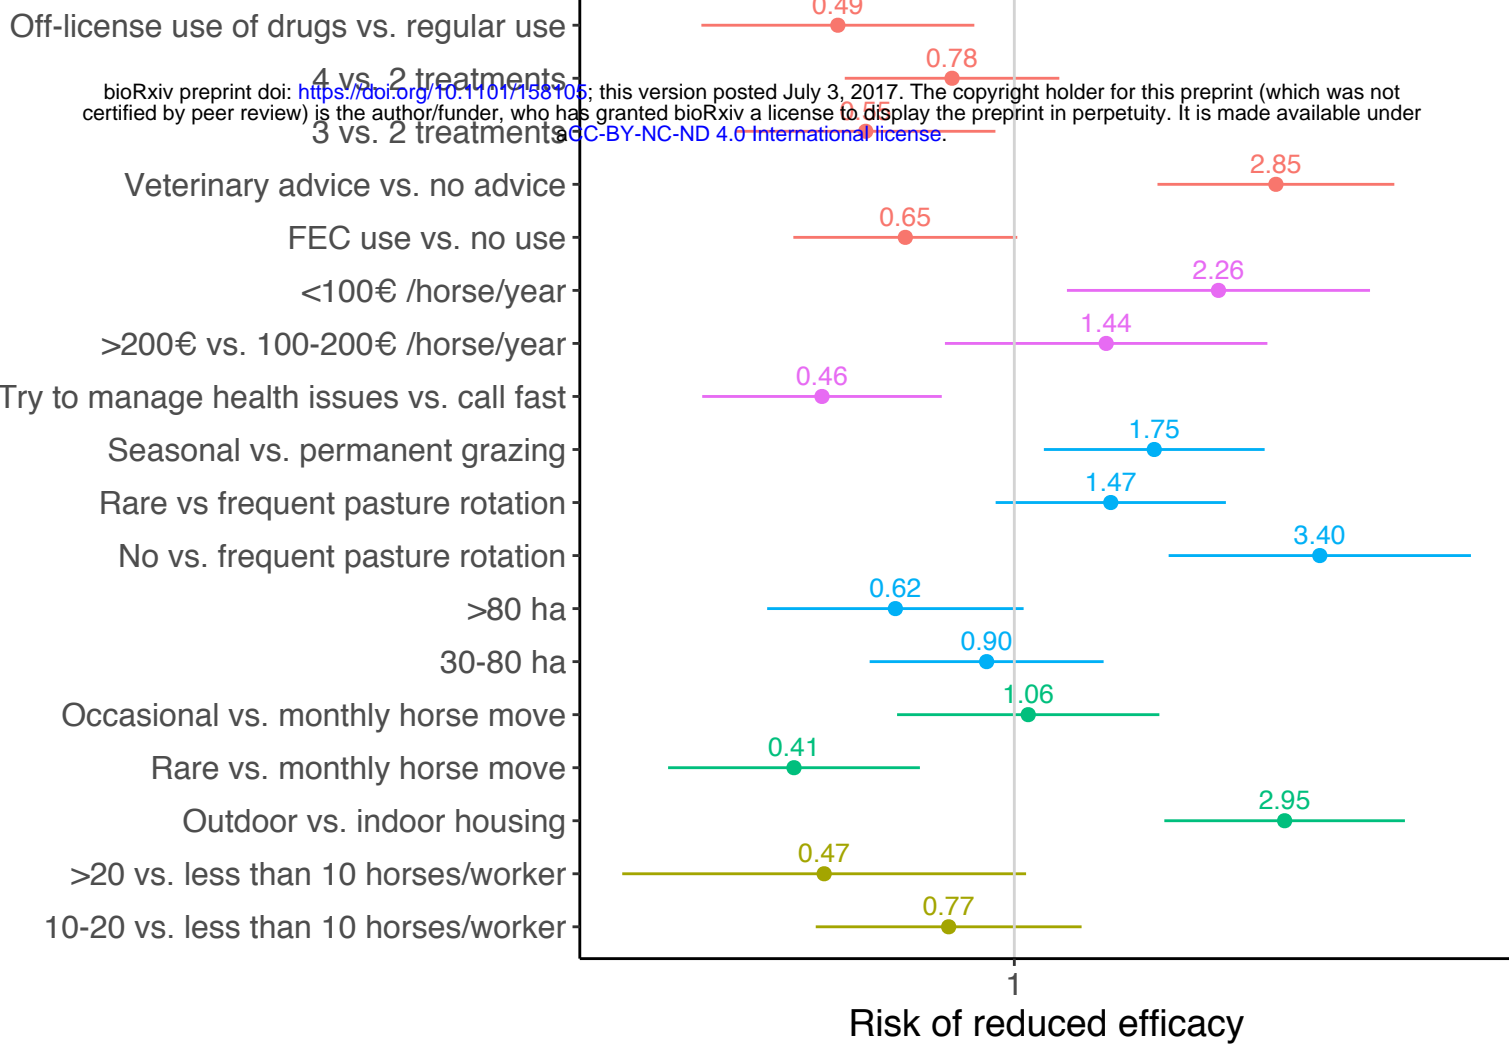

B

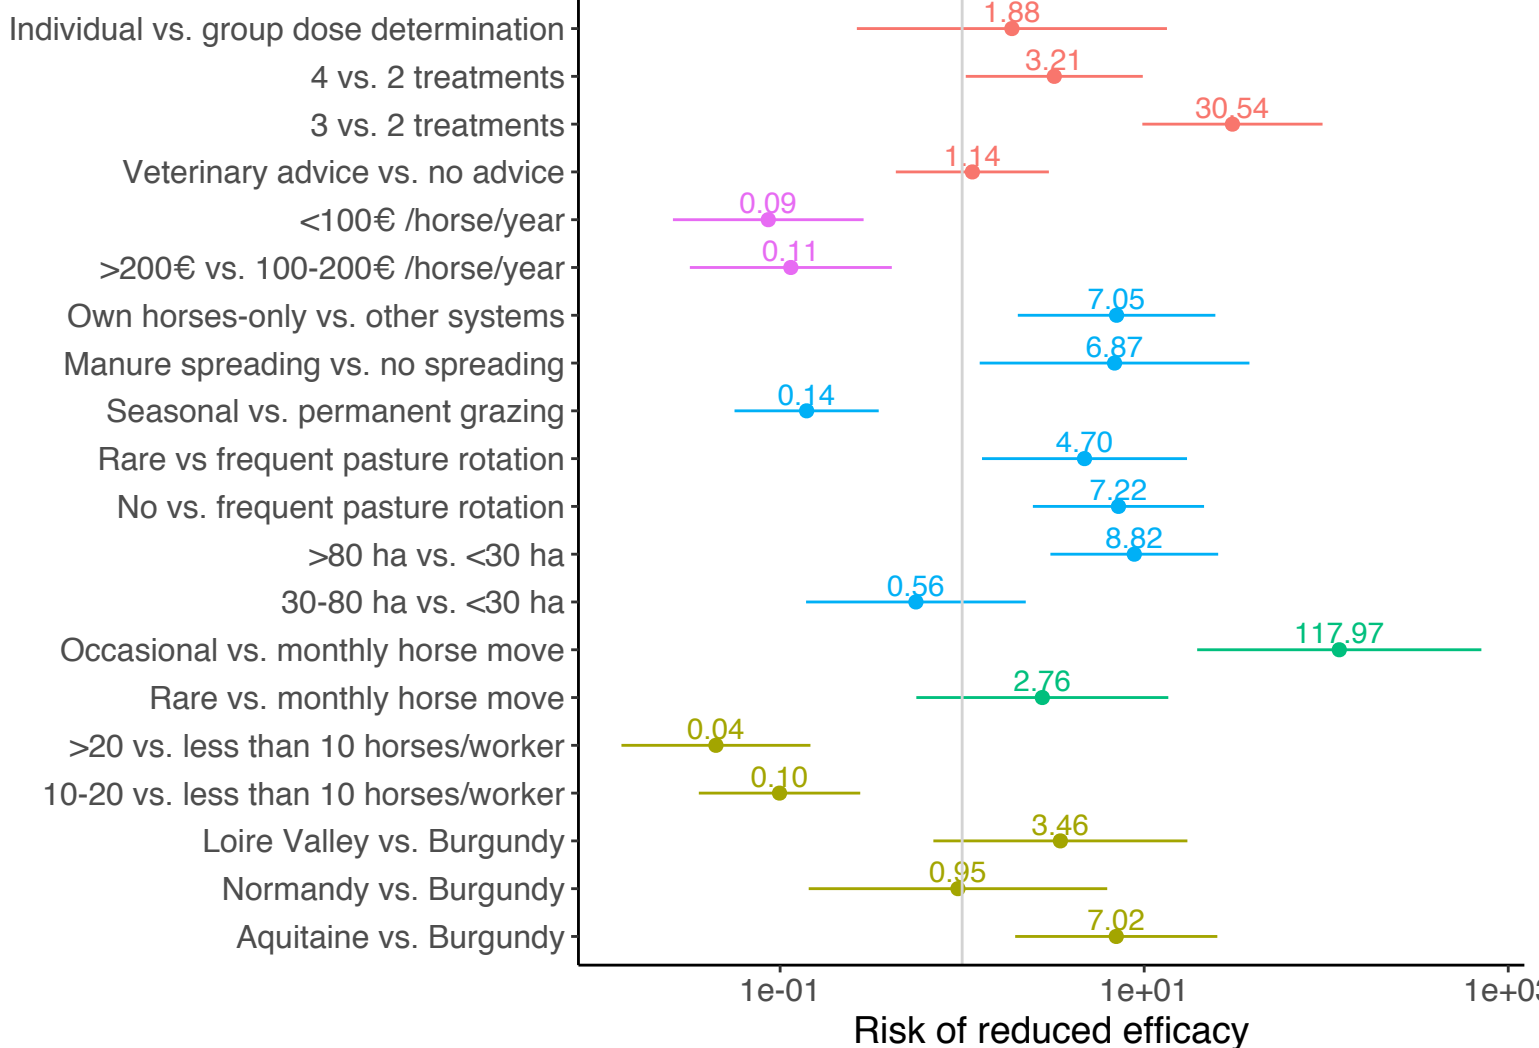

Source: http://www.biorxiv.org/content/10.1101/158105v1.full.pdf
